# Supplementary material
Source: PubMed Central journal article supplement (PMC4339120)

A)

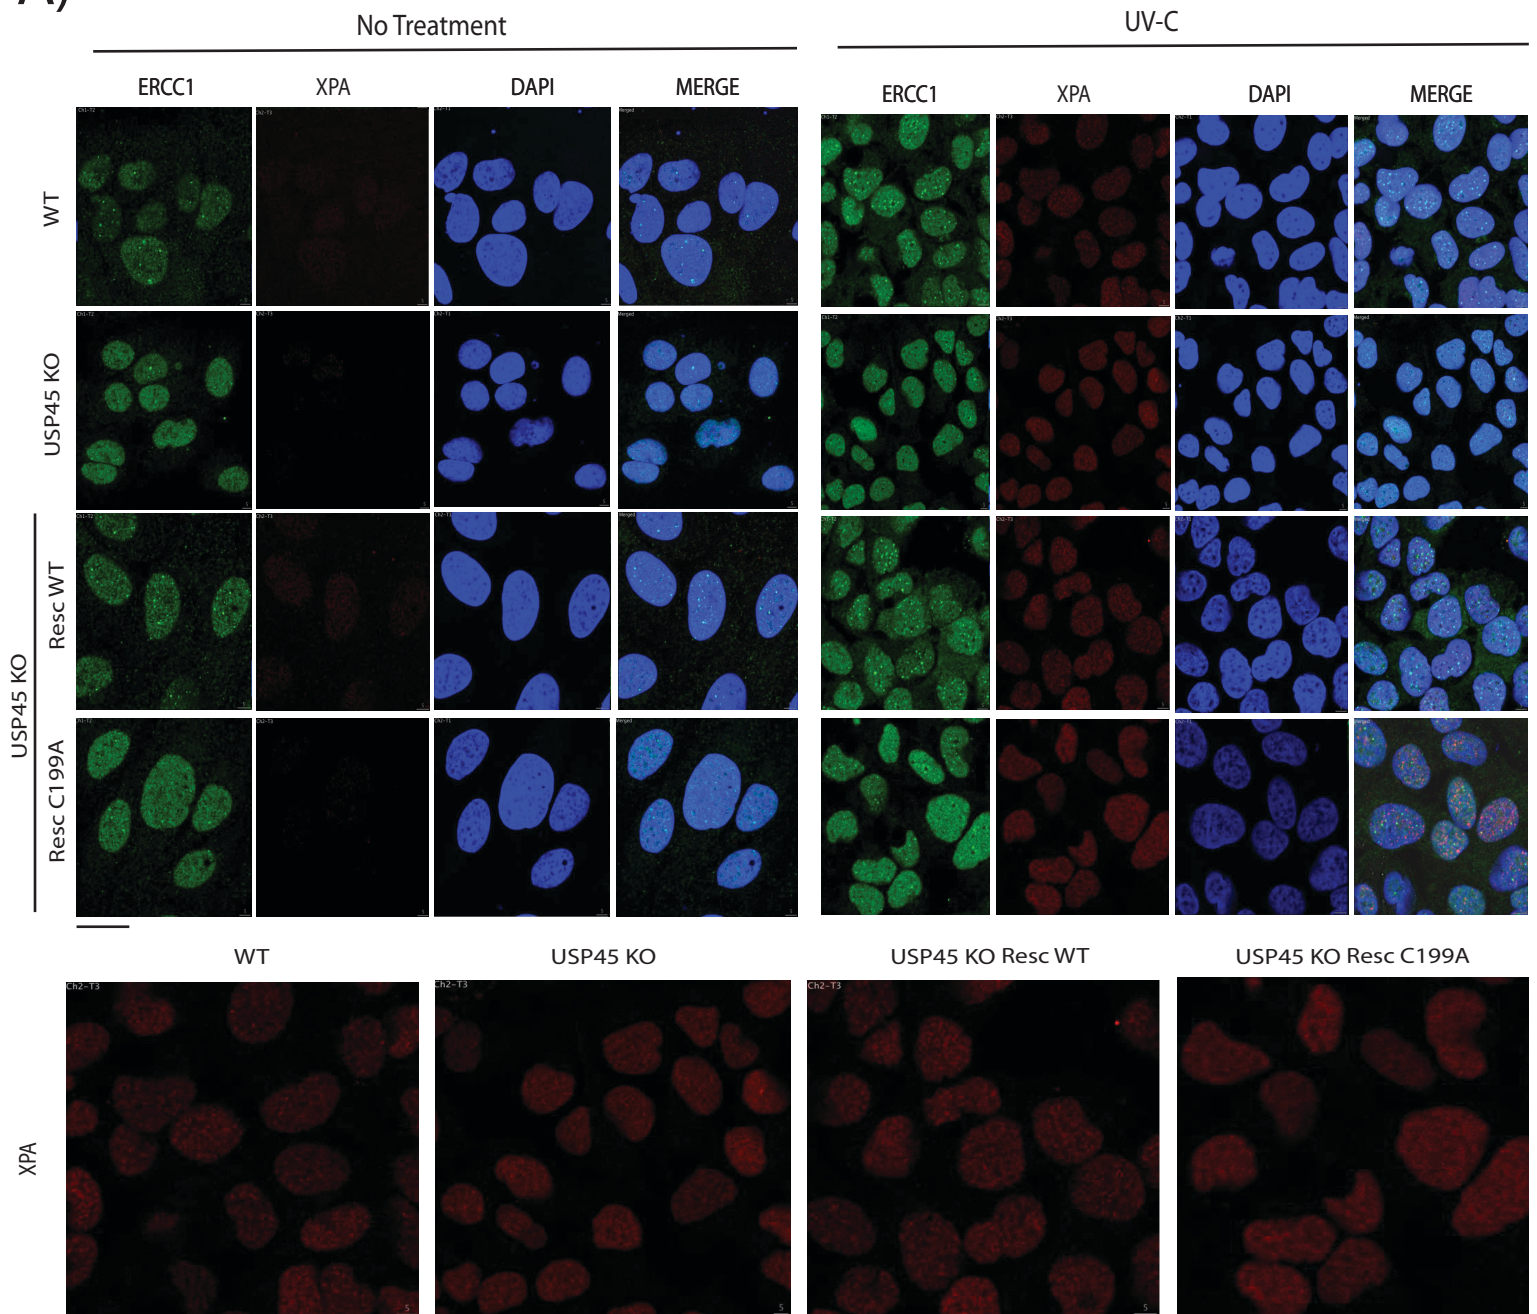

B)

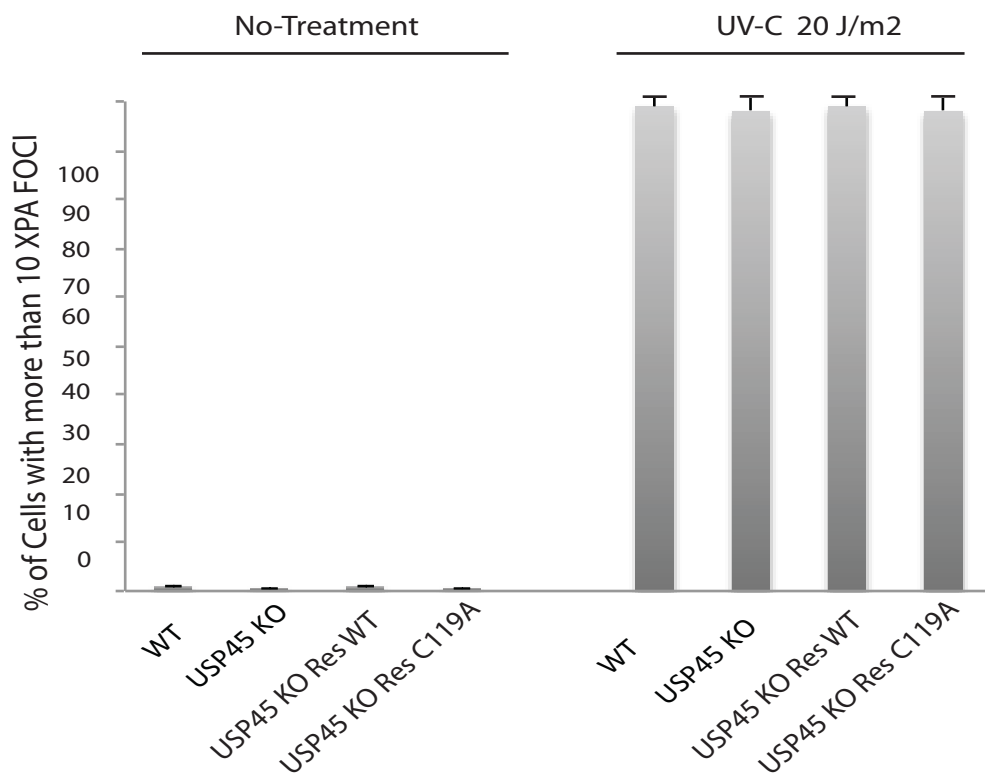

Supplement: embj0034-0326-sd11.pdf [file embj0034-0326-sd11.pdf]

A)

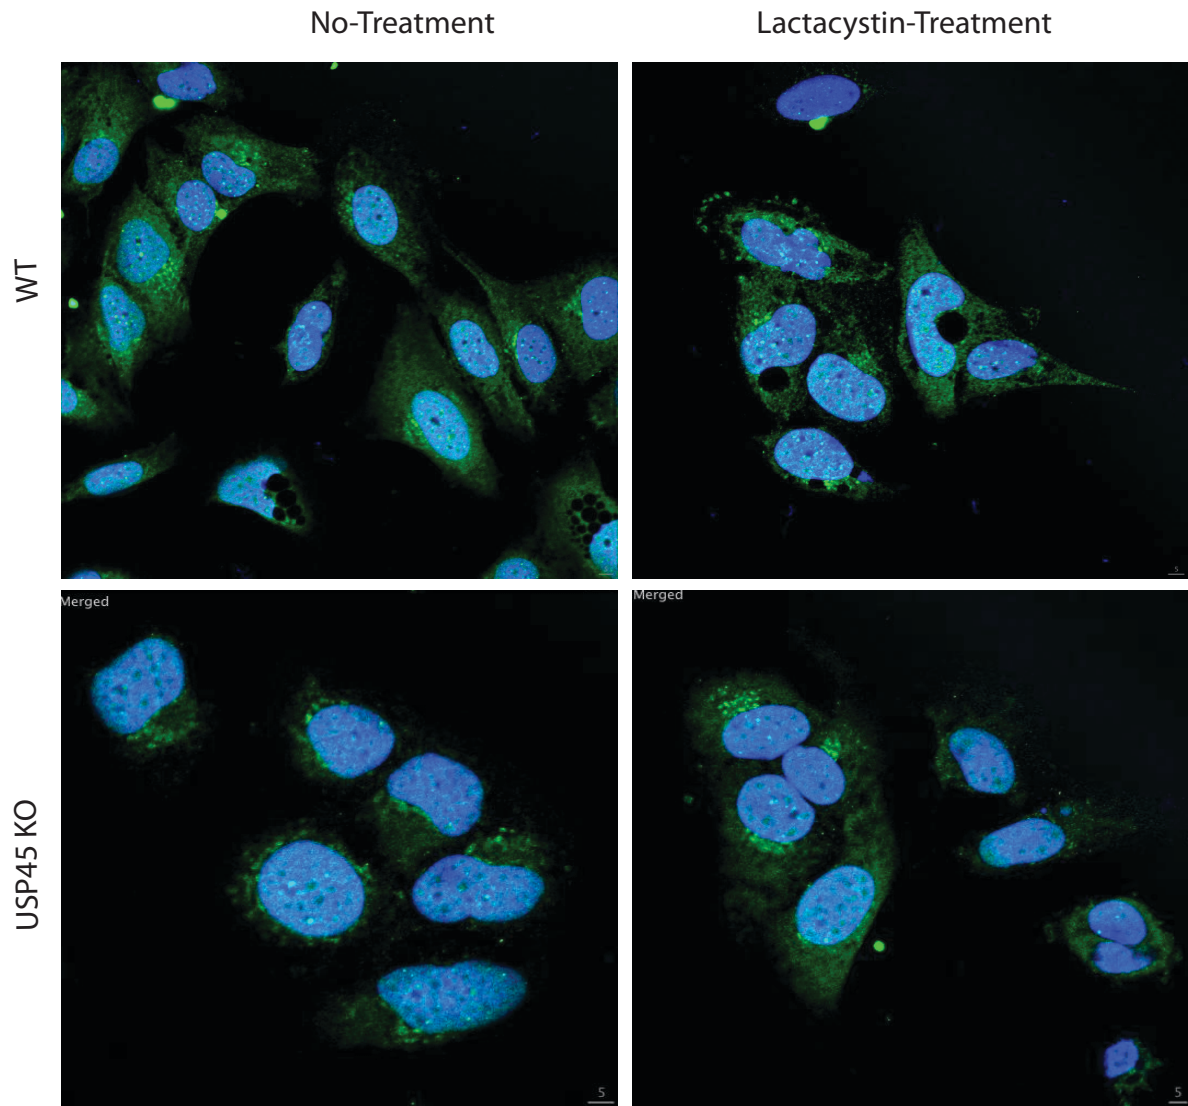

B)

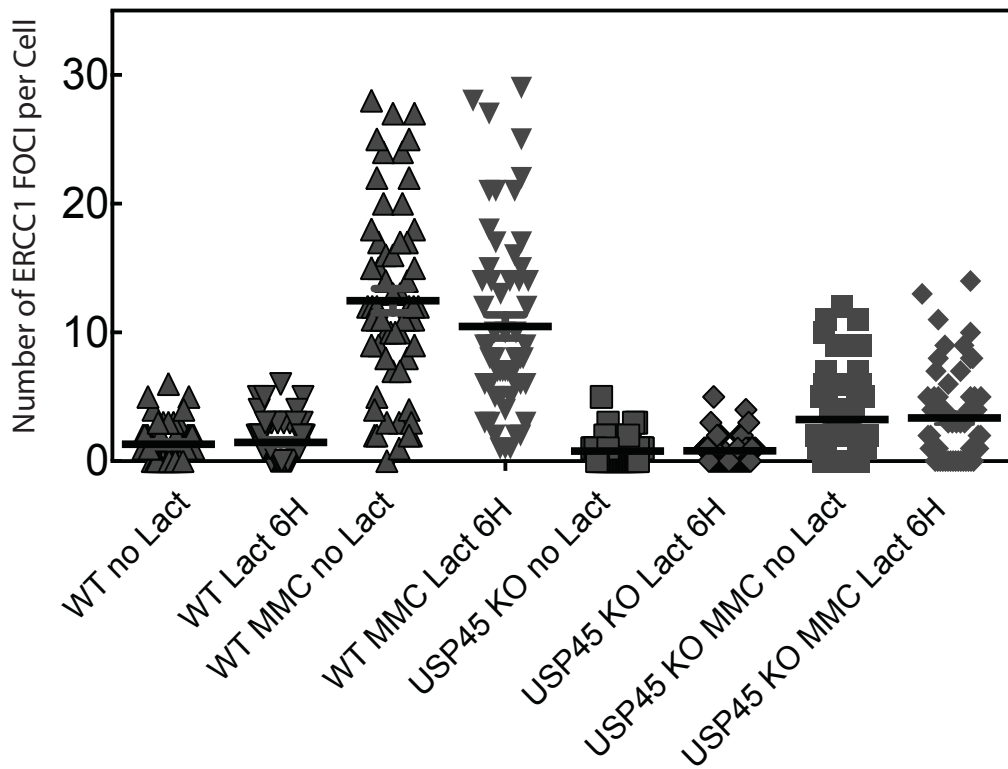

Supplement: embj0034-0326-sd12.pdf [file embj0034-0326-sd12.pdf]

A)

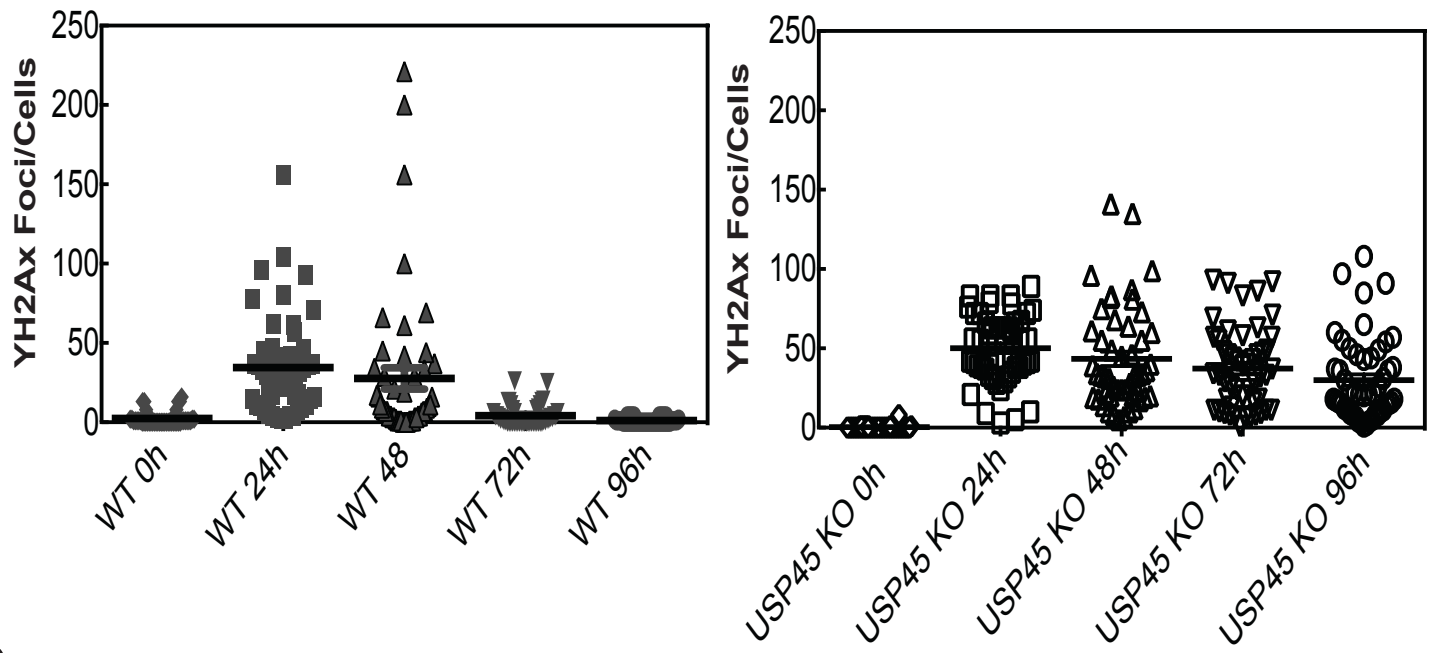

B)

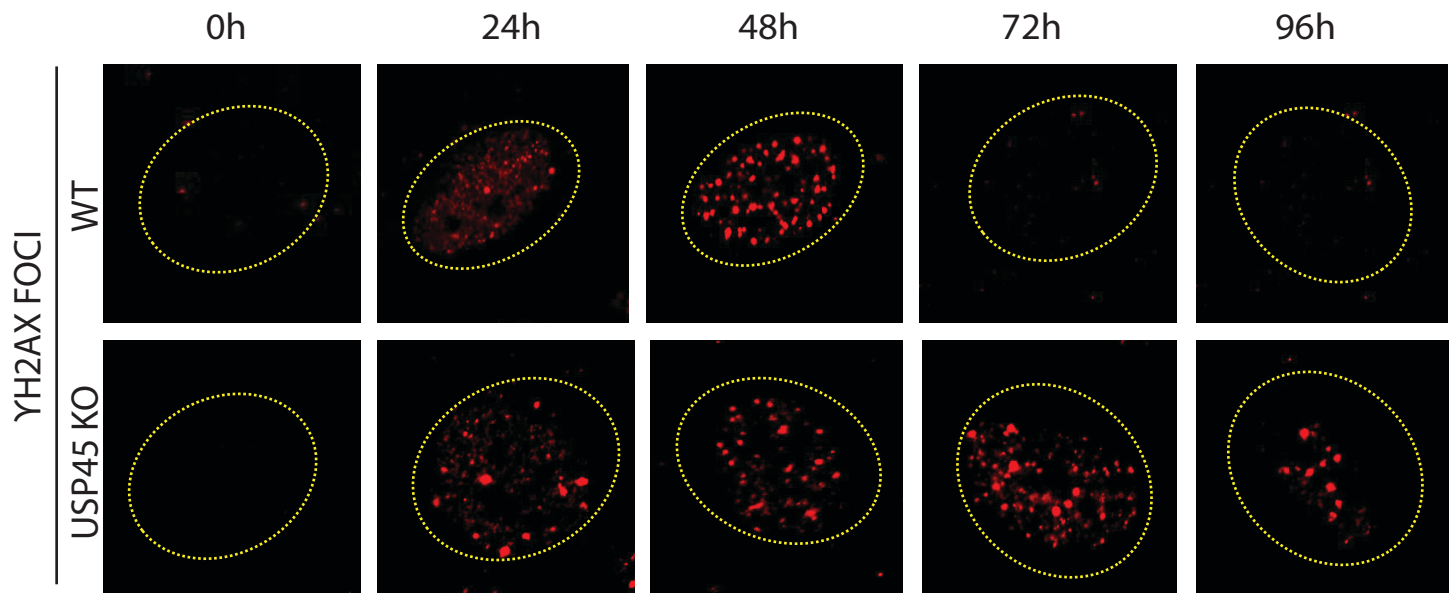

Supplement: embj0034-0326-sd14.pdf [file embj0034-0326-sd14.pdf]

A)

Quantification of data shown in Fig 3C

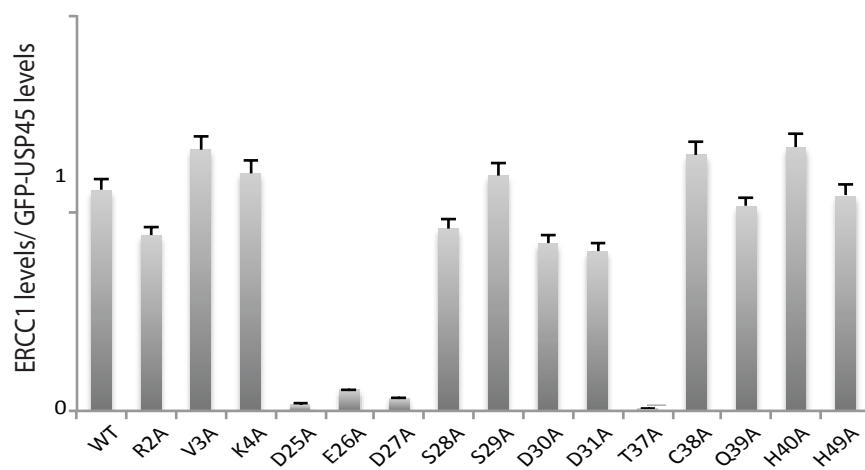

Supplement: embj0034-0326-sd4.pdf [file embj0034-0326-sd4.pdf]

A)

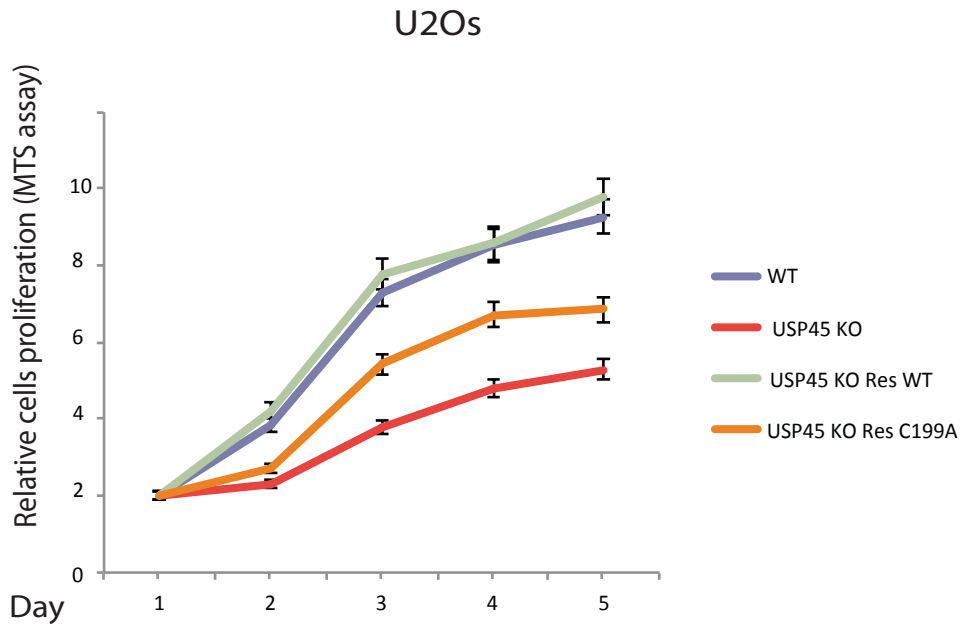

B)

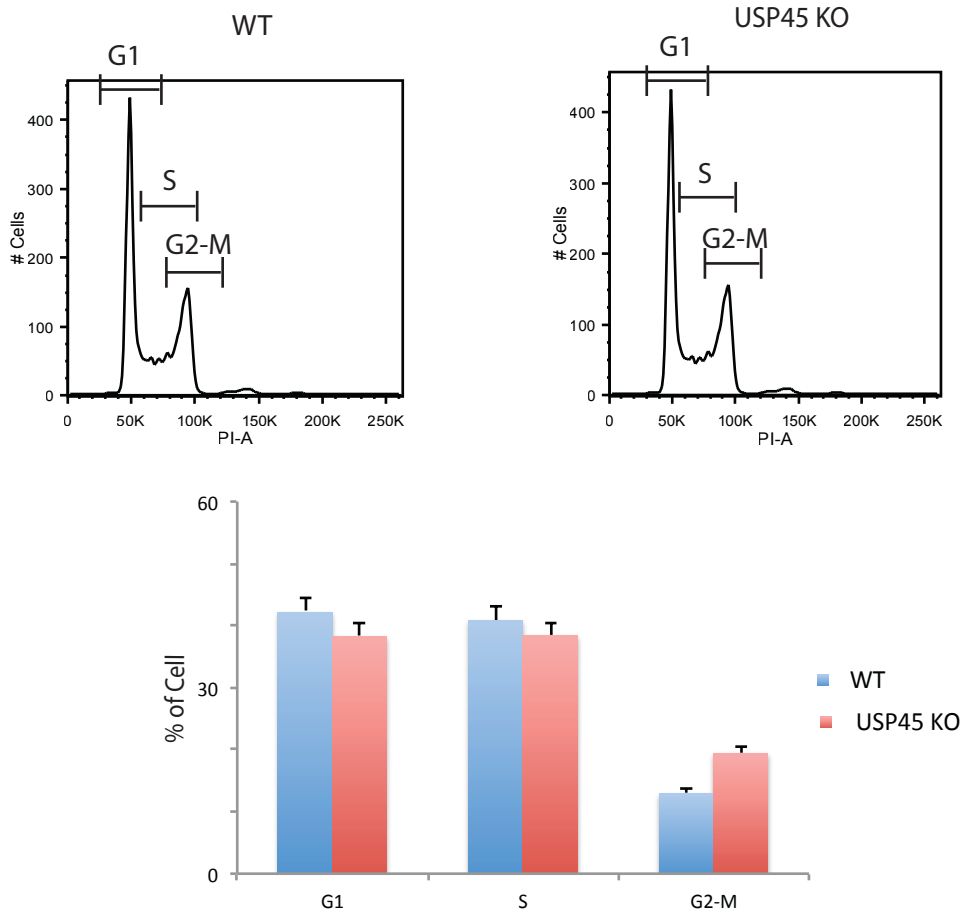

Sup Figure 6

Supplement: embj0034-0326-sd6.pdf [file embj0034-0326-sd6.pdf]

A)

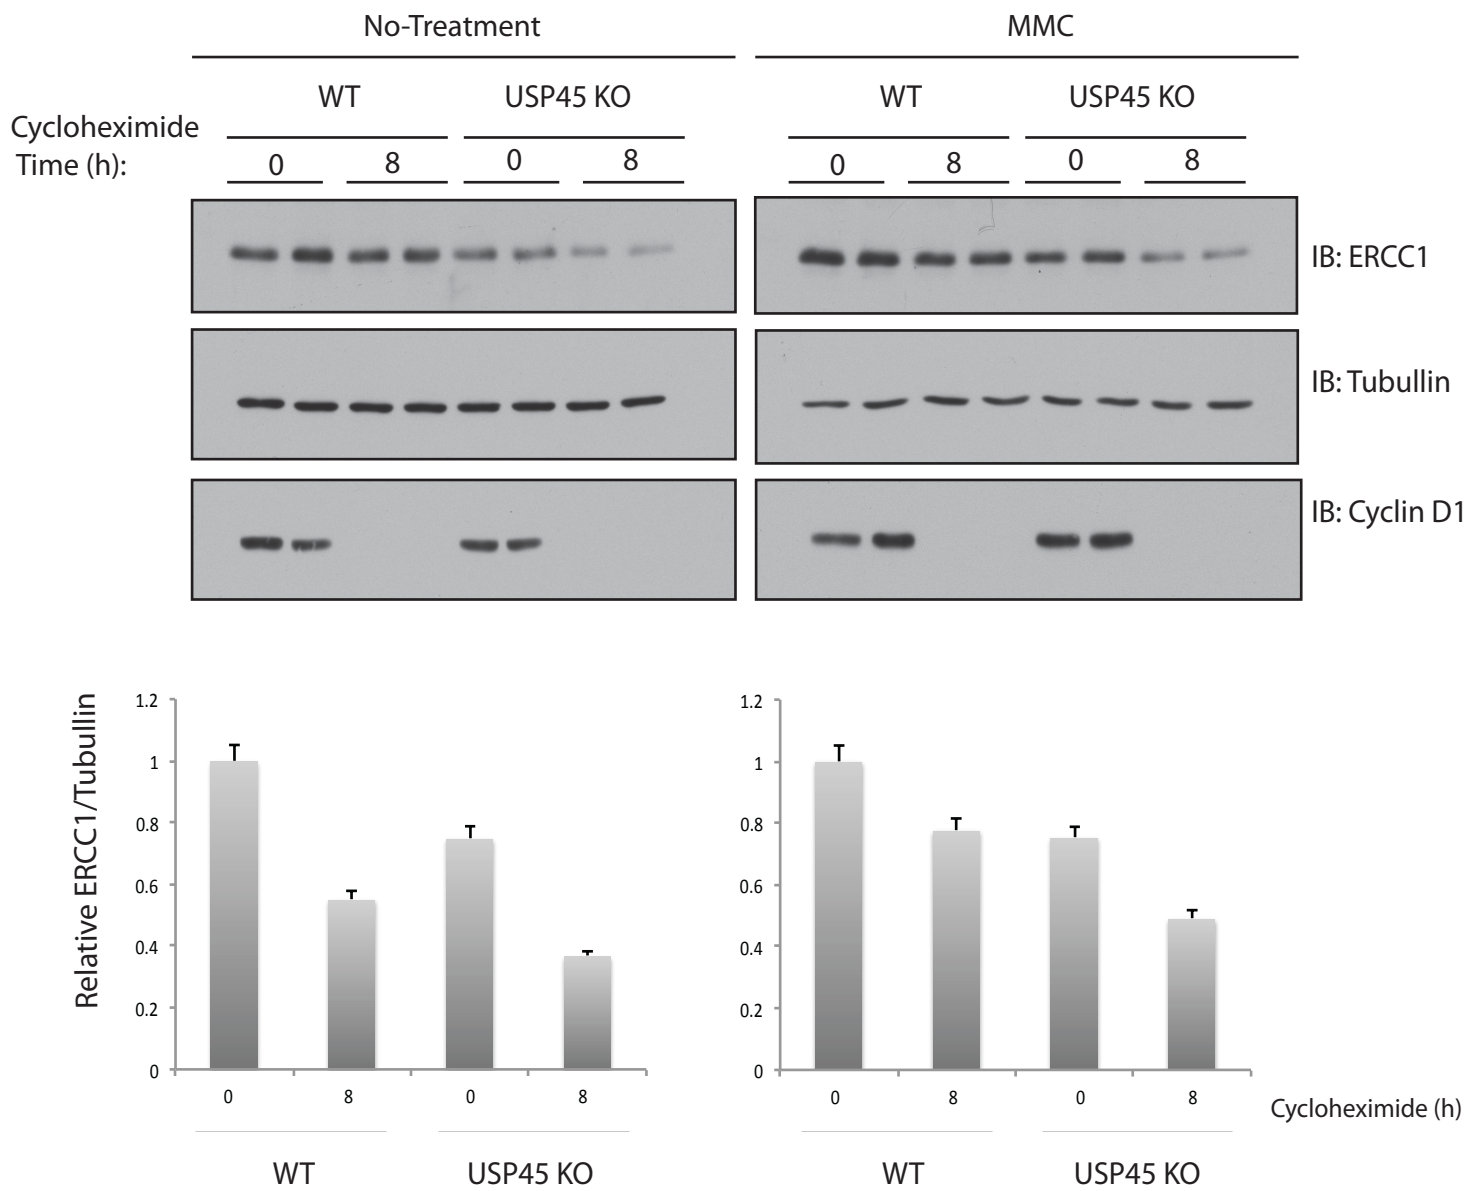

Supplement: embj0034-0326-sd8.pdf [file embj0034-0326-sd8.pdf]

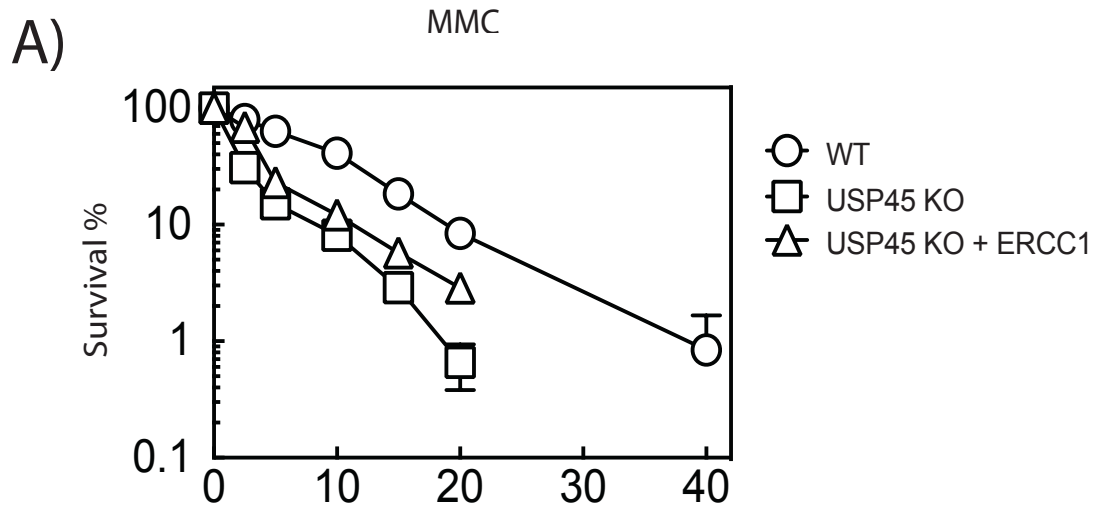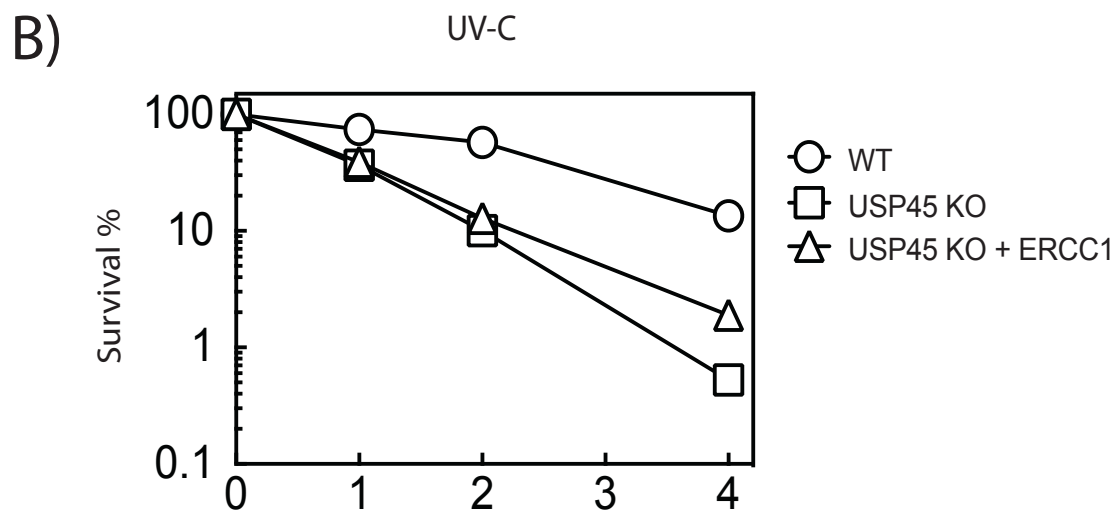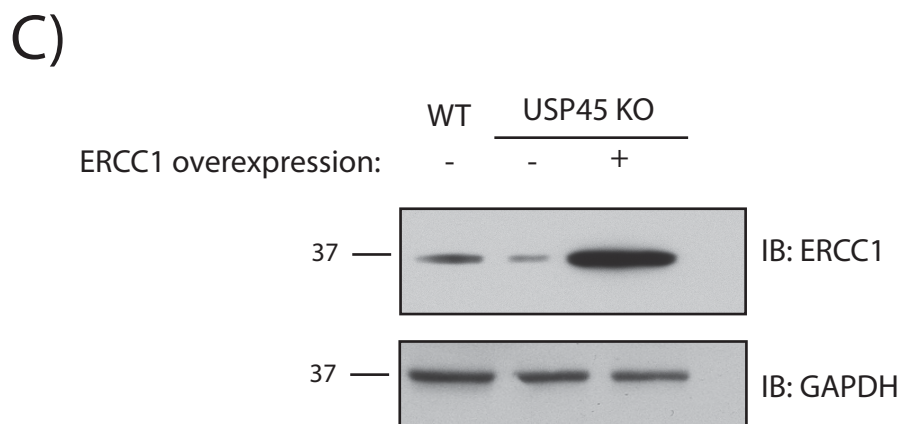

Supplement: embj0034-0326-sd9.pdf [file embj0034-0326-sd9.pdf]
